# Supplementary material for: An online intelligent detection method for slurry density in concept drift data streams based on collaborative computing
Source: PeerJ journal article supplement (doi:10.7717/peerj-cs.2683), 2025-02-12
Supplement: Datasets.zip [file Datasets.zip]

## Sheet: Sheet1
Ground Truth	OGPR-FMRSC	OGPRSWM-OSSC	OGPRSWM-OSRSC	OGPRSWM-FWRSC	OGPRSWM-FMRSC
1176.57	1191.78	1191.58	1175.38	1161.05	1180.6
1185.87	1189.58	1188.21	1192.93	1179.72	1186.66
1170.3	1171.12	1171.29	1176.13	1178.64	1170.51
1168.51	1152.68	1173.73	1173.09	1178.36	1183.51
1175.47	1173.11	1160.06	1177.35	1172.25	1166.05
1177.75	1174.73	1181.61	1171.2	1177.71	1184.16
1164.33	1163.62	1173.29	1159.76	1160.01	1156.64
1173.25	1167.92	1176.3	1178.68	1163.05	1168.34
1176.53	1176.16	1177.84	1177.04	1160.25	1183.61
1183.12	1179.06	1174.54	1189.46	1197.31	1173.4
1187.81	1176.64	1193.6	1189.61	1178.61	1180.96
1177.96	1185.48	1179.77	1178.03	1179.19	1169.57
1183.66	1191.15	1183.74	1186.96	1196.55	1179.47
1179.84	1194.37	1174.77	1166.3	1175.94	1182.65
1181.05	1181.48	1188.76	1179.24	1179.08	1190.57
1186.44	1183	1197.67	1180.99	1188.24	1181.79
1183.86	1179.22	1187.35	1190.59	1180.27	1191.4
1177.77	1164.62	1185.84	1171.6	1179.48	1168.69
1183.72	1192.07	1195.65	1185.24	1180.35	1200.69
1177.5	1168.14	1191.79	1173.37	1186.92	1174.31
1180.59	1170.52	1182.62	1184.14	1184.44	1177.09
1184.07	1182.32	1182.15	1189.68	1173.41	1186.35
1179.49	1192.13	1175.76	1177.21	1167.58	1180.38
1182.74	1184.75	1182.86	1183.11	1176.83	1181.55
1185.53	1176.83	1190.5	1186.51	1179.93	1172.42
1190.99	1184.93	1199.43	1197.04	1184.28	1197.66
1185.67	1190.98	1181.83	1182.34	1193.46	1191.25
1185.54	1184.18	1186.89	1185.33	1179.03	1182.44
1175.52	1168.98	1166.55	1171.33	1171.32	1166.37
1180.41	1178.46	1191.79	1171.67	1181.43	1182.41
1164.64	1170.98	1161.12	1165.55	1147.17	1173.29
1178.56	1195.35	1181.78	1181.58	1182.11	1164.88
1180.27	1169.69	1173.8	1172.78	1185.13	1171.42
1177.58	1172.26	1174.9	1190.36	1189.57	1178.16
1173.98	1167.15	1167.81	1167	1165.3	1167.51
1177.73	1157.17	1193.08	1183.45	1173.56	1174.89
1190.4	1182.55	1193.64	1192.96	1192.11	1189.46
1181.99	1173.29	1180.49	1166.86	1178.62	1187.92
1193.58	1203.14	1185.06	1192.72	1180.84	1199.53
1188.42	1187.3	1182.93	1174.4	1196.2	1195.96
1178.23	1164.43	1183.34	1176.67	1175.68	1185.15
1176.95	1182.44	1191.94	1182.04	1179.91	1171.89
1188.06	1185.03	1175.18	1203.11	1178.68	1169.16
1179.5	1164.68	1171.24	1185.51	1187.76	1181.8
1191.91	1186.84	1190.33	1178.27	1188.83	1195.26
1201.12	1196.11	1195.46	1197.47	1194.84	1204.45
1199.08	1191.65	1184.15	1211.19	1205.9	1193.67
1185.15	1185.4	1185.32	1186.02	1194.73	1199.98
1183.08	1163.97	1189.84	1197.44	1174.94	1169.85
1185.95	1183.67	1171.76	1179.11	1194.57	1192.13
1172.05	1180.66	1173.95	1166.64	1186.11	1176.8
1175.64	1182.89	1184.32	1163.48	1177.91	1182.71
1189.64	1199.06	1198.46	1185.69	1177.39	1200.43
1181.38	1190.89	1177.6	1191.39	1186.32	1185.12
1187.8	1200.44	1208.54	1179.21	1197.07	1190.3
1193.66	1184.15	1198.66	1200.08	1184.82	1191.3
1194.76	1201.95	1187.46	1197.98	1209.3	1200.65
1189.91	1174.09	1198.77	1195.94	1188.24	1192.85
1204.45	1199.32	1194.34	1201.56	1203.44	1210.6
1195.87	1179.59	1203.93	1195.38	1205.43	1186.84
1190.26	1199.17	1178.9	1207.76	1192.12	1178.23
1182.12	1193.46	1189.23	1170.81	1193.02	1182.49
1196.88	1195.2	1191.63	1202.66	1196.83	1200.89
1179.35	1194.43	1189.54	1191.61	1182.79	1167.28
1190.87	1185.13	1197.53	1194.1	1191.12	1182.83
1201.45	1202.73	1205.48	1214.85	1203.59	1198.64
1193.11	1194.41	1193.64	1167.17	1198.24	1195.3
1196.42	1187.37	1206.2	1193.11	1200.68	1198.84
1196.46	1200.18	1180.23	1185.78	1193.89	1204.13
1206.65	1223.13	1210.54	1202.36	1214.85	1205.3
1208.42	1199.71	1212.14	1206.75	1207.73	1211.68
1208.27	1215.91	1213.33	1211.61	1218.78	1218.23
1196.35	1195.04	1203.79	1188.3	1201.78	1194.19
1208.09	1223.13	1241.41	1214.75	1207.38	1225.76
1205.08	1209.19	1206.13	1190.9	1198.78	1202.21
1189.74	1195.49	1196.98	1197.13	1190.17	1190.73
1186.96	1192.43	1188.33	1184.01	1199.09	1172.24
1198.44	1200.56	1212.59	1182.52	1200.17	1197.79
1185.81	1173.94	1167.62	1169.84	1194.33	1181.67
1190.75	1202.58	1206.03	1174.61	1190.08	1185.79
1189.54	1177.89	1183.39	1180.18	1186.89	1191.85
1178.43	1180.46	1158.07	1178.51	1172.45	1169.88
1197.8	1203.02	1188.1	1208.11	1180.99	1199.58
1195.96	1188.84	1194.39	1201.71	1198.74	1180.45
1187.92	1189.15	1189.66	1175.62	1188.29	1184.08
1190.88	1200.8	1190.46	1170.33	1190.48	1201.49
1191.62	1191.41	1198.97	1188.06	1198.44	1192.67
1176.13	1168.58	1175.81	1162.98	1167.6	1180.88
1191.8	1167.02	1191.23	1189.27	1206.58	1184.76
1196.72	1188.46	1177.43	1189.84	1184.03	1186.56
1183.14	1178.12	1187.53	1203.95	1185.34	1193.98
1195.86	1191.47	1204.95	1180.12	1185.53	1203.83
1193.07	1184.91	1189.28	1194.65	1190.71	1199.8
1189.52	1192.72	1172.62	1204.21	1199.58	1189.52
1183.98	1179.09	1171.95	1179.37	1171.01	1193.15
1192.92	1191.99	1207.98	1185.13	1194.47	1189.67
1222.66	1228.43	1217.2	1235.81	1223.59	1228.07
1217.64	1210.37	1211.66	1198.43	1219.18	1222.78
1219.59	1217.04	1212.21	1203.81	1221.78	1212.66
1228.78	1247.13	1234.91	1217.14	1235.73	1239.88
1232.52	1239.95	1227.23	1234.73	1236.79	1233.56
1228.68	1217.68	1220.86	1234.08	1231.92	1235.07
1232.15	1231.48	1218.6	1229.88	1239.88	1220.52
1242.28	1247.07	1241.31	1259.7	1248	1233.05
1221.48	1231.96	1230.49	1218.56	1220.32	1218.22
1210.91	1212.18	1209.58	1209.74	1200.19	1214.94
1210.29	1205.78	1218.23	1206.55	1217.16	1219.39
1222.81	1216.6	1224.38	1232.19	1219.76	1225.78
1225.81	1231.3	1227.14	1224.84	1240.06	1224.9
1232.17	1234.83	1233.78	1227.76	1227.24	1236.72
1235.35	1230.96	1235.66	1248.73	1224.8	1233.64
1224.94	1223.33	1234.18	1234.99	1234.73	1226.29
1232.21	1228.67	1236.6	1239.87	1225.67	1235.38
1226.6	1232.76	1221.4	1214.86	1213.51	1221.31
1222.42	1216.56	1223.58	1212.37	1232.58	1225.65
1225.76	1229.9	1225.08	1222.84	1213.04	1214.51
1230.88	1238.12	1235.25	1227.83	1242.25	1224.55
1226.5	1230.63	1228.12	1222.01	1218.11	1231.7
1230.02	1222.93	1233.75	1227.33	1233.48	1225.02
1232.81	1244.25	1219.52	1237.6	1234.66	1236.63
1237.63	1231.86	1241.05	1228.23	1221.75	1239.43
1245.66	1249.29	1257.48	1247.05	1245.42	1244.16
1230.73	1224.32	1218.58	1226.64	1226.97	1242.58
1233.15	1218.32	1247.56	1228.35	1234.14	1236.91
1227.12	1229.03	1229.79	1224.04	1231.63	1222.6
1236.07	1238.51	1234.2	1241.76	1249.68	1232.11
1216.15	1215.49	1199.91	1217.94	1213.97	1217.14
1227.14	1229.49	1236.93	1219.85	1226.16	1215.55
1229.14	1223.63	1220.41	1231.42	1247.76	1238.13
1240.99	1234.73	1236.39	1241.64	1247.18	1240.46
1229.57	1228.15	1234.49	1232.64	1236.08	1216.21
1223.54	1239.77	1214.31	1220.85	1210.12	1215.83
1236.73	1243.65	1227.85	1244.86	1224.46	1247.73
1245.28	1240.86	1234.92	1248.19	1240.35	1247.02
1237.63	1242.38	1236.63	1227.53	1235.88	1254.52
1246.17	1242.11	1251.47	1234.9	1250.31	1246.33
1223.05	1219.16	1226.68	1210.73	1246.72	1226.67
1222.12	1229.43	1225.79	1225.27	1211.11	1237.33
1225.89	1221.43	1222.8	1219.74	1222.2	1242.51
1233.74	1219.5	1235.01	1230.53	1239.08	1226.44
1213.87	1206.17	1207.66	1213.07	1216.1	1220.73
1205.6	1206.35	1223.58	1215.92	1215.23	1197.37
1224.16	1225.25	1225.91	1242.67	1221.52	1220.48
1210.23	1220.78	1192.63	1209.13	1202.28	1196.57
1225.5	1219.42	1215.88	1242.41	1243.54	1230.01
1223.49	1229.71	1237.9	1228.08	1227.18	1215.52
1228.02	1231.64	1215.72	1238.23	1217.46	1221.89
1237.09	1235.83	1233.15	1234.63	1233.93	1252.05
1220.45	1227.55	1224.08	1209.78	1219.75	1227.33
1220.35	1224.53	1210.48	1224.42	1207.19	1218.99
1220.22	1212.89	1229.82	1231.2	1226.75	1206.14
1217.91	1227.02	1233.02	1204.53	1219.01	1220.33
1216.3	1205.92	1208.88	1215.74	1212.89	1198.31
1210.56	1211.07	1220.73	1212.39	1204.64	1203.43
1212.64	1212.66	1204.62	1217.7	1226.71	1217.78
1206.8	1210.41	1197.82	1197.49	1205.84	1213.05
1227.94	1221.78	1230.15	1223.13	1220.91	1229.05
1216.97	1216.68	1219.12	1224.87	1198.87	1223.27
1236.74	1235.54	1231.37	1252.12	1227.16	1238.17
1226.94	1235.42	1234.52	1227.78	1232.64	1220.81
1217.42	1210.65	1204.19	1225.74	1230.05	1217.56
1210.26	1210.88	1202.56	1211.68	1199.78	1223.72
1224.44	1222.22	1214.74	1228.1	1206.29	1224.03
1222.99	1211.95	1229.81	1219.66	1222.91	1225.32
1223.8	1246.55	1231.04	1221.82	1223.02	1228.06
1236.02	1235.41	1242.02	1231.08	1243.14	1225.16
1216.73	1204.09	1205.07	1217.54	1210.16	1208.68
1218.99	1230.96	1220.18	1228.38	1219.54	1206.69
1227.32	1218.22	1231.44	1228.91	1210.77	1230.07
1230.64	1233.79	1216.09	1236.21	1219.49	1227.76
1225.71	1233.04	1218.31	1220.21	1220.56	1215.96
1218.71	1213.2	1224.53	1224.8	1214.45	1208.76
1228.44	1224.78	1234.77	1201.46	1232.67	1234.07
1231.3	1226.7	1233.59	1219.1	1241.54	1237.71
1216.2	1215.1	1221.08	1213.28	1203.44	1219.35
1233.36	1219.57	1236.28	1217.75	1247.62	1233.48
1229.46	1218.96	1230.81	1234.24	1222.56	1233.3
1223.7	1222.5	1222.71	1225.41	1219.65	1223.7
1238.3	1247.13	1230.46	1230.42	1247.73	1240.97
1217.93	1223.3	1215.72	1218.67	1196.67	1214.6
1230.2	1244.9	1226.57	1217.22	1217.2	1222.07
1223.74	1229.64	1244.6	1215.93	1216.17	1217.73
1242.22	1237.88	1244.56	1238.86	1242.58	1244.07
1242.24	1241.2	1242.15	1228.45	1251.32	1255.23
1223.14	1205.88	1221.05	1232	1232.36	1216.23
1232.31	1224.14	1231.27	1226.61	1224.03	1223.39
1218.13	1209.46	1215.68	1226.8	1224.34	1223.58
1228.84	1231.14	1233.75	1227.53	1224.88	1234.32
1236.99	1242.5	1236.73	1239.59	1249.65	1231.09
1244.31	1239.55	1251.61	1236.47	1241.6	1239.43
1249.24	1244.24	1242.98	1246.56	1258.18	1244.24
1235.63	1222.48	1238.78	1231.98	1226.4	1237.87
1231.69	1230.6	1239.58	1233.65	1238.17	1255.37
1228.02	1230.13	1217.63	1239.71	1215.85	1221.99
1224.4	1228.19	1225.91	1219.56	1225.09	1226.38
1225.14	1218.48	1227.36	1223.7	1210.79	1220.86
1238.49	1255.39	1235.47	1241.52	1236.99	1239.24
1238.61	1248.77	1234.22	1245.91	1231.51	1241.43
1227.4	1226.59	1210.7	1226.42	1218.67	1229.16
1242.99	1238.51	1253.33	1239.69	1244.86	1234.68
1225.9	1223.16	1217.5	1220.89	1232.53	1217.67
1233.3	1234.58	1222.13	1233.34	1234.1	1240.11
1237.1	1236.94	1243.02	1239.14	1239.59	1238.72
1229.6	1233.71	1213.11	1223.75	1235.7	1230.58
1233.91	1240.45	1242.58	1231.28	1244.34	1237.88
1223.71	1235.32	1227.62	1230.16	1232.41	1217.28
1227.59	1237.35	1232.98	1227.37	1230.94	1236.43
1233.99	1233.05	1232.51	1229.09	1251.21	1227
1231.71	1235.01	1220.76	1237.73	1227.12	1222.7
1229.05	1225.76	1212.05	1235.11	1235.85	1220.64
1222.17	1217.18	1235.28	1227.38	1212.05	1220.49
1234.68	1250.92	1230.44	1240.36	1255.34	1254.62
1296.47	1292.56	1291.82	1293.09	1294.15	1296.11
1294	1310.93	1308.24	1295.74	1295.21	1295.55
1305.46	1302.5	1299.78	1308.14	1317.32	1316.72
1283.82	1285.97	1281.67	1284.85	1281.97	1280.13
1299.9	1309.16	1297.77	1284.95	1292.38	1288.04
1300.82	1301.02	1299.58	1300.66	1284.5	1295.03
1300.27	1303.61	1290.91	1303.26	1297.71	1296.42
1305.11	1303.06	1300.07	1309.32	1322.71	1291.36
1298.69	1294.65	1310.26	1296.16	1299.95	1295.64
1296.46	1295.05	1303.31	1296.74	1311.33	1296.3
1294.14	1288.62	1267.34	1278.76	1301.13	1309.14
1294.85	1308.72	1277.23	1282.13	1290.72	1300.09
1284.01	1282.58	1287.01	1258.76	1271.46	1284.04
1287.56	1302.2	1286.54	1285.61	1285.63	1282.51
1279.94	1257.12	1276.57	1293.76	1285.07	1273.18
1282.27	1282.42	1291.65	1297.16	1280.09	1267.03
1299.57	1304.35	1283.51	1289.98	1300.8	1297.37
1309.18	1306.68	1319.97	1314.72	1313.93	1290.4
1307.64	1316.94	1308.82	1318.36	1304.17	1305.32
1290.61	1296.05	1295.55	1288.03	1277.65	1302.42
1292.44	1290.1	1294.72	1275.72	1289.23	1288.27
1300.16	1303.86	1307.77	1312.27	1304.76	1302.31
1300.39	1324.3	1298.14	1297.36	1292.83	1292.4
1282.56	1284.7	1277.68	1279.23	1272.94	1266.7
1304.12	1306.66	1311.15	1318.69	1294.95	1304.98
1315.65	1311.91	1317.22	1319.66	1313.15	1312.52
1296.39	1297.53	1285.1	1303.6	1294.84	1298.89
1292.76	1281.8	1304.91	1306.43	1291.79	1292.6
1301.08	1299.4	1311.98	1299.87	1289.53	1304.68
1302.66	1323.55	1315.63	1294.42	1302.41	1297.8
1293.56	1302.63	1294.28	1300.36	1287.56	1296.63
1295.89	1301.34	1299.04	1296.02	1287.12	1302.66
1307.28	1316.67	1303.85	1313.76	1290.62	1302
1299.81	1315.8	1291.05	1303.41	1289.55	1296.14
1305.3	1310.35	1305.89	1299.03	1299.37	1312.5
1319.04	1336.64	1320.63	1319.51	1319.69	1321.85
1301.89	1310.99	1295.93	1299.3	1304.85	1299.14
1304.09	1305.51	1320.56	1302.37	1303.76	1291.02
1314.87	1329.48	1300.32	1314.81	1316.26	1311.67
1314.64	1294.59	1307.31	1317.93	1304.19	1325.32
1309.69	1304.83	1303.64	1311.77	1316.03	1305.21
1318.87	1321.13	1330.5	1308.36	1325.38	1316.44
1322.61	1314.86	1320.3	1328.33	1327.97	1314.58
1297.1	1295.77	1294.18	1285.23	1292.19	1295.28
1314.39	1308.96	1306.42	1333.6	1313.07	1313.39
1316.21	1310.65	1309.33	1310.07	1311.56	1317.46
1326.99	1350.04	1315.25	1326.85	1314.94	1320.9
1312.87	1318.2	1322.01	1324.63	1309.34	1303.16
1305.57	1305.11	1311.05	1304.25	1291.54	1320.95
1313.36	1324.54	1322.27	1302.94	1297.41	1313.59
1303.64	1301.62	1297.68	1291.84	1307.95	1295.95
1305.62	1313.15	1328.23	1308.4	1309.87	1303.33
1299.26	1302.24	1290.43	1303.15	1306.01	1302
1308.75	1322.57	1290.26	1316.19	1304.41	1316.28
1296.89	1284.82	1294.26	1299.59	1296.61	1298.29
1301.49	1308	1302.73	1297.78	1305.63	1297.98
1311.08	1312.12	1317.88	1315.48	1307.34	1314.11
1309.89	1300.05	1300.73	1322.54	1291.68	1298.15
1307.66	1316.72	1312.98	1301.23	1326.71	1299.4
1322.13	1314.71	1337.5	1352.94	1332.48	1330.92
1305.63	1319.4	1297.97	1302.46	1316.13	1306.36
1313.04	1317.41	1306.38	1324.09	1313.43	1311.7
1302.98	1308.89	1287.66	1319.43	1295.66	1297.16
1310.88	1311.56	1313.05	1319.03	1311.25	1300.92
1307.94	1315.63	1315.66	1310.91	1310.14	1309.06
1315.97	1300.11	1322.87	1322.5	1303.76	1315.43
1298.45	1299.09	1305.96	1310.2	1294.06	1311.1
1307.86	1302.52	1320.6	1285.76	1312.49	1300.4
1301.76	1304.16	1302.91	1306.05	1314.66	1300.99
1308.39	1307.99	1316.96	1305.3	1313.49	1304.76
1289.39	1294.63	1280.83	1283.84	1285.71	1281.54
1295.13	1288.01	1288.02	1296.48	1283.81	1308.48
1305.76	1321.39	1307.93	1307.62	1323.3	1315.59
1302.24	1321.93	1294.88	1306.78	1303.21	1302.5
1315.28	1313.51	1320.43	1310.61	1321.86	1303.5
1312.03	1311.9	1324.41	1321.93	1312.24	1313.59
1305.49	1307.93	1309.12	1287.95	1293.76	1308.49
1304.89	1315.64	1298.26	1296.88	1323.72	1299.25
1312.62	1328.75	1305.89	1302.46	1318.39	1299.23
1311.39	1301.14	1323.68	1312.46	1321.98	1324.54
1306.93	1301.7	1299.74	1302.81	1300.03	1295.31
1298.67	1289.64	1299.48	1303.3	1298.37	1306.23
1294.73	1285.27	1292.4	1288.14	1306.57	1288.55
1294.01	1280.07	1294.48	1305.04	1290.88	1290
1305.81	1308.89	1315.68	1312.19	1299.49	1312.8
1303.62	1293.77	1298.77	1299.29	1293.76	1293.75
1302.15	1314.93	1289.46	1287.77	1290.29	1298.61
1315.91	1323.63	1328.98	1305.79	1323.07	1314.54
1303.36	1294.61	1305.37	1290.17	1302.79	1311.6
1295.29	1286.53	1301.82	1305.85	1279.55	1302.22
1310.71	1305.5	1310.53	1317.15	1323.92	1310.85
1309.44	1321.34	1316.44	1298.63	1320.51	1298.84
1307.88	1300.66	1319.26	1323.93	1317.89	1316.32
1302.7	1290.01	1315	1300.19	1286.56	1298.57
1313.81	1313.39	1311.35	1294.62	1314.68	1315.17
1297.59	1300.77	1294.42	1306.86	1308.84	1282.22
1306.75	1301.16	1310.3	1317.86	1297.68	1304.52
1298.23	1311.99	1300.09	1298.29	1291.21	1301.37
1293.9	1295.94	1298.99	1286.26	1291.77	1290.27
1294.66	1298.51	1288.26	1305.18	1277.02	1298.61
1301.45	1294.18	1280.53	1297.16	1303.29	1310.78
1288.52	1288.18	1292.57	1288.37	1297.1	1300.09
1294.18	1292.85	1301.21	1298.18	1299.92	1289.01
1310.41	1291.1	1316.2	1313.02	1323.39	1297.6
1398.2	1400.65	1413.14	1394.3	1398.99	1378.12
1397.05	1381.8	1404.72	1388.18	1396.75	1393.65
1410.86	1410.61	1407.36	1417.28	1409.18	1397.26
1392.39	1379.86	1401.26	1373.57	1386.25	1395.16
1400.51	1417.68	1399.75	1403.34	1391.12	1383.18
1395.27	1398.04	1406.56	1397.58	1388.75	1402.78
1386.86	1394.18	1389	1391.35	1386.07	1386.37
1401.89	1409.7	1405.97	1398.77	1397.14	1388.43
1403.46	1392.2	1405.51	1405.35	1404.33	1404.69
1402.55	1383.15	1403.04	1409.32	1403.18	1406.11
1393.04	1390.24	1379.57	1384.17	1398.56	1396.5
1417.28	1424.91	1417.8	1417.76	1412.74	1416.2
1402.41	1403.19	1381.96	1405.68	1384.33	1406.27
1412.35	1419.03	1416.83	1401.65	1403.92	1415.45
1391.11	1399.07	1400.03	1383.07	1407.71	1387.4
1410.54	1397.86	1429	1424.03	1417.05	1410.19
1407.4	1409.85	1410.77	1416.27	1403.8	1396.1
1418.22	1434.94	1411.77	1411.92	1416.4	1423.18
1399.05	1394.2	1384.74	1405.23	1398.26	1387.8
1417.68	1400.43	1435.21	1421.19	1413.55	1415.15
1400.21	1398.24	1387.38	1412.21	1401.89	1389.88
1402.94	1398.99	1411	1412.7	1408.89	1409.2
1405.3	1408.85	1384.54	1384.65	1415.89	1405.46
1389.37	1381.78	1388.91	1386.86	1386.19	1380.06
1395.82	1396.59	1401.96	1407.58	1393.26	1396.71
1397.12	1378.27	1400.05	1411.09	1394.21	1394.2
1401.77	1409.03	1401.39	1396.55	1402	1405.73
1389.99	1403.47	1382.56	1379.53	1399.22	1389.04
1402.7	1413.73	1394.54	1404.92	1396.1	1401.04
1404.85	1391.97	1413.93	1399.42	1424.05	1401.71
1400.02	1402.73	1403.94	1399.92	1404.85	1385.76
1390.59	1365.23	1389.15	1380.67	1400.26	1393
1399.3	1401.7	1401.16	1405.85	1391.44	1403.8
1410.91	1410.36	1402.57	1415.81	1407.64	1401.95
1404.98	1396.51	1414.18	1408.93	1400.41	1407.6
1390.48	1393.4	1401.83	1381.17	1390.89	1398.32
1397.41	1398.58	1390.39	1383.08	1379.69	1403.27
1398	1405.99	1398.92	1387.16	1402.35	1406.94
1388.81	1389.89	1398.24	1393.07	1374.17	1394.75
1393.8	1395.8	1388.02	1378.52	1397.12	1389.5
1397.23	1380.7	1415.54	1402.86	1406.17	1413.34
1397.01	1387.15	1410.61	1412.13	1396.59	1396.69
1388.79	1384.74	1386.28	1383.47	1387.4	1383.45
1385.52	1388.04	1394.33	1383.97	1384.18	1396.31
1394.39	1394.33	1409.34	1402.8	1392.61	1388.3
1391.52	1404.28	1380.32	1399.34	1393.98	1397.73
1389.86	1382.47	1395.43	1384.64	1397.98	1383.16
1388.36	1386.32	1387.06	1386.91	1394.24	1397.09
1398.13	1400.3	1396.18	1399.21	1411.49	1407.87
1411.07	1409.1	1417.46	1408.86	1412.21	1407.18
1409.71	1413.92	1405.42	1414.68	1405.63	1413.92
1394.72	1389.87	1382.12	1397.59	1391.07	1400.08
1397.59	1409.66	1384.79	1408.77	1387.26	1396.7
1405.23	1402.51	1405.05	1390.77	1402.34	1409.03
1399.89	1409.38	1405.55	1410.04	1395.27	1398.87
1400.68	1400.42	1400.46	1407.7	1416.76	1395.4
1403.58	1416.25	1402.2	1402.52	1408.72	1395.63
1396.39	1384.5	1396.11	1400.01	1412.63	1398.48
1395.93	1400.32	1407.53	1404.32	1379.96	1400.07
1407.11	1403.43	1411.88	1409.75	1410.38	1413.55
1396.01	1397.97	1389.29	1393.98	1405.62	1399.79
1382.63	1392.77	1380.03	1385.12	1386.14	1388.05
1407.6	1397.92	1418.44	1401.77	1404.3	1404.92
1388.74	1377.5	1383.52	1377.68	1390.94	1402.49
1401.14	1392.65	1397.59	1393.79	1402.76	1394.88
1406.48	1408.64	1406.26	1400.01	1408.38	1412.75
1399.22	1383.18	1389.64	1400.93	1402.29	1398.23
1413.34	1414.16	1421.46	1420.18	1422.35	1411.42
1400.39	1389.45	1380.68	1402.57	1403.15	1416.8
1387.7	1377.98	1400.77	1400.19	1391.03	1392.29
1393.03	1389.89	1389.11	1392.38	1394.03	1384.58
1403.85	1407.08	1392.54	1398.49	1408.68	1407.26
1400.56	1395.23	1403.1	1394.49	1395.29	1397.6
1405.85	1401.66	1390.45	1398.31	1411.78	1420.99
1391.96	1391.6	1396.8	1389.49	1390.12	1386.18
1387.18	1384.86	1394.14	1399	1395.55	1388.27
1412.55	1389.8	1407.37	1400.17	1408.45	1409.03
1400.85	1397.2	1397.35	1405.7	1401.39	1396.86
1421.6	1422.32	1430.14	1421.65	1421.11	1427.8
1425.05	1434.38	1419.02	1432.36	1417.29	1434.42
1396.28	1413.68	1396.49	1392.5	1406.41	1406.55
1393.73	1399.4	1396.86	1400.13	1398.01	1393.33
1399.92	1400.59	1413.96	1395.94	1401.3	1395.98
1388.41	1380.21	1383.89	1394.05	1400.14	1393.25
1405.22	1405.98	1405.54	1388.88	1403.44	1402.71
1415.81	1422.43	1426	1420.31	1416.7	1428.63
1401.27	1412.02	1378.26	1407.92	1411.91	1391.02
1416.18	1408.7	1413.76	1402.98	1438.42	1420.26
1402.55	1404.56	1385.36	1410.12	1404.36	1393.5
1412.86	1419.8	1396.3	1403.58	1427.97	1405.66
1400.47	1416.28	1418.08	1409.26	1403.07	1388.52
1408.24	1410.41	1410.14	1408.62	1402.42	1398.5
1399.99	1395.39	1413.34	1406.26	1405.45	1404.41
1389.4	1383.53	1387.22	1393.01	1401.2	1384.15
1403.52	1400.48	1408.38	1393.79	1406.31	1395.42
1405.64	1400.1	1401.76	1419.29	1410.77	1396.34
1386.49	1393.52	1381.57	1397.33	1378.19	1379.41
1385.29	1394.38	1384.62	1377.12	1366.67	1381.97
1376.98	1383.14	1378.13	1382.32	1380.04	1383.8
1377.98	1388.12	1391.78	1382.45	1366.43	1378.17
1397.73	1393.87	1395.96	1392.52	1397.82	1397.34
1393.78	1397.01	1397.2	1385.5	1388.69	1392.82
1403.69	1400.42	1401.38	1415.17	1405.45	1409.21
1401.15	1401.52	1402.45	1398.36	1408.97	1393.82
1401.27	1411.68	1389.47	1409.58	1386.97	1403.68
1404.15	1403.89	1413.97	1420.94	1402.98	1395.4
1411.84	1395.99	1407.15	1416.6	1410.62	1403.49
1412.51	1410.36	1412.88	1405.61	1424.17	1417.34
1414.62	1408.56	1412.69	1423.63	1415.17	1414.97
1414.03	1401.2	1422.89	1403	1406.91	1412.39
1417.21	1410.49	1421.91	1410.15	1412.14	1409.51
1414.31	1422.48	1414.43	1439.87	1429.85	1417.71
1418.24	1432.53	1419.82	1412.14	1410.51	1435.1
1416.61	1412.45	1419.7	1420.25	1416.97	1420.92
1413.76	1422.29	1420.57	1405.43	1416.01	1418.18
1410.42	1420.44	1414.98	1410.05	1400.43	1409.68
1429.29	1419.44	1440.86	1431.67	1422.15	1438.53
1418.34	1418.01	1432.91	1396.49	1401.18	1415.32
1415.08	1414.7	1420.61	1410.16	1407.16	1438.06
1436.8	1438.27	1424.9	1443.09	1442.43	1438.88
1445.23	1431.68	1460.96	1453.26	1447.03	1445.84
1439.62	1436.66	1458.97	1443.14	1423.19	1449.33
1443.49	1452.48	1440.21	1436.07	1455.87	1435.01
1439.22	1449.95	1435.49	1443.21	1427.69	1434.05
1439.53	1455.1	1421	1435.97	1431.26	1434.07
1435.47	1432.6	1442.48	1429.52	1449.34	1433.92
1439.92	1455.81	1430.85	1440.52	1443.93	1453.79
1443.83	1449.49	1460.29	1463.79	1443.17	1436.71
1434.28	1422.73	1411.98	1427.2	1447.21	1453.73
1440.4	1446.87	1441.05	1449.84	1439.76	1448.18
1422.67	1419.68	1428.74	1425.42	1425.68	1435.18
1437.94	1442.35	1434.32	1425.9	1433.03	1439.95
1425.95	1425.08	1418.79	1418.77	1424.91	1414.37
1421.38	1431.65	1423.62	1420.5	1420.77	1412.3
1431.99	1434.18	1427.25	1428.54	1441.53	1442.56
1415.25	1412.85	1412.16	1418.04	1409.82	1413.07
1422.54	1430.74	1422.19	1414.66	1420.81	1425.64
1411.59	1413.77	1406.57	1403.51	1392.76	1414.23
1429.38	1425.87	1427.33	1438.47	1414.52	1441.34
1434.01	1444.86	1441.09	1434.28	1439.99	1444.56
1423.71	1420.23	1420.19	1417.01	1420.27	1426.79
1435.05	1429.63	1436.54	1435.58	1431.97	1436.33
1428.33	1423.75	1421.53	1444.47	1433.51	1436.6
1412.86	1400.4	1421.08	1408.44	1409.9	1405.03
1420.6	1415.9	1409.02	1408.47	1421.34	1415.73
1408.87	1424.69	1417.48	1417.35	1406.33	1399.17
1424.59	1416.87	1397.35	1441.8	1407.02	1417.97
1418.37	1418.44	1410.17	1429.58	1423.53	1407.06
1420.82	1411.4	1406.51	1410.12	1433.51	1428.02
1414.42	1409.22	1423.54	1397.37	1424.45	1412.93
1423.6	1436.5	1426.01	1434.78	1423.94	1438.09
1411.41	1419.03	1399.61	1410.32	1413.48	1409.48
1425.5	1420.31	1420.32	1430.2	1428.61	1428.26
1413.59	1413.65	1425.63	1412.41	1426.4	1410.4
1419.18	1412.16	1418.58	1433.85	1429.26	1425.49
1416.04	1409.38	1421	1417.03	1412.79	1421.26
1418.98	1411.2	1405.29	1416.64	1417.53	1416.96
1423.17	1415.55	1409.5	1424.71	1421.11	1426.28
1423.83	1426.6	1428.83	1413.95	1418.49	1418.48
1411.88	1416.95	1432.48	1413.57	1406.16	1408.08
1419.29	1423.44	1414.25	1418.81	1417.73	1411.9
1424.1	1422.66	1429.23	1406.36	1402.8	1431.38
1407.24	1395.69	1398.53	1397.76	1409.93	1400.34
1428.32	1427.75	1439.37	1417.86	1423.81	1420.19
1065.77	1057.91	1061.46	1052.61	1054.67	1073.57
1068	1075.49	1063.86	1071.21	1065.75	1067.45
1073.86	1078.59	1056.6	1083.61	1066.72	1063.43
1056.24	1062.59	1052.26	1059.12	1065.97	1047.66
1071.3	1068.34	1072.72	1058.81	1061.07	1066.73
1074.45	1059.06	1086.59	1059.4	1074.34	1065.77
1069.45	1077.6	1058.61	1076.18	1071.72	1068.68
1069.36	1079.79	1077.92	1066.8	1061.45	1059.89
1064.46	1051.85	1061.09	1063.65	1053.11	1054.87
1070.26	1071.43	1067.37	1059.25	1072.8	1076.09
1062.27	1072.41	1053.43	1045.03	1058.1	1075.12
1059.74	1050.6	1044.11	1078.57	1050.93	1069.92
1138.14	1153.16	1126.88	1132.95	1125	1134.84
1145.71	1142.74	1159.99	1144.02	1150.26	1149.71
1147.84	1138.7	1136.76	1138.05	1160.08	1146.15
1134.84	1146.5	1130.54	1147.77	1129.62	1148.67
1133.58	1136.08	1143.13	1130.48	1137.45	1135.77
1130.08	1124.53	1110.64	1128.61	1138.82	1133.77
1135.45	1142.93	1139.01	1135.71	1143.41	1150.14
1131.06	1114.43	1126	1130.81	1125.44	1140.74
1136.86	1152.29	1138.07	1148.75	1140.84	1137.85
1132.56	1125.62	1139.88	1116.92	1137.9	1124.71
1132.8	1135.23	1130.95	1137.97	1154.09	1129.97
1129.88	1126.49	1127.63	1124.41	1131.28	1119
1203.37	1207.07	1209.42	1199.69	1211.96	1216.48
1191.99	1199.54	1197.25	1186.53	1198.69	1190.74
1213.33	1206.32	1206.37	1216.72	1218.63	1218.81
1200.62	1207.31	1198.45	1189.48	1191.96	1202.23
1207.78	1205.28	1195.2	1202.95	1210.1	1202.13
1206.35	1200.5	1217.49	1210.86	1219.05	1208.62
1210.63	1208.72	1199.25	1205.5	1207.41	1213.64
1197.19	1188.65	1198.39	1192.87	1199.19	1196.92
1203.18	1196.41	1218.42	1206.1	1196.52	1203.01
1207.45	1215.52	1214.24	1207.92	1209.79	1210.16
1195.68	1194.4	1192.61	1192.55	1198.7	1188.36
1197.57	1207.27	1190.57	1197.73	1203.56	1196.72
1305.2	1308.86	1299.12	1297.37	1301.93	1301.69
1307.86	1299.14	1315.72	1314.83	1304.34	1302
1307.75	1291.62	1310.42	1298.15	1303.05	1308.89
1311.3	1305.46	1310.88	1297.33	1313.7	1294.38
1306.6	1308.84	1329.7	1309.88	1308.2	1295.94
1304.02	1304.1	1296.17	1292.49	1323.19	1302.43
1311.73	1304.68	1307	1303.24	1306.49	1323.68
1297.77	1306.38	1294.08	1295.55	1303.7	1302.21
1305.2	1290.36	1306.85	1310.82	1300.69	1299.34
1300.24	1289.54	1302.73	1295.77	1296.38	1311.44
1299.98	1301.06	1297.23	1295.8	1309.2	1301.09
1313.62	1332.27	1319.96	1309.56	1317.3	1308.36
1329.95	1333.47	1334.51	1332.7	1334.55	1328.91
1319.04	1310.49	1316.01	1314.24	1307.83	1330.69
1332.26	1337.3	1309.86	1333.82	1354.28	1338.44
1320.35	1326.16	1327.12	1331.4	1338.04	1314.76
1333.63	1341.6	1324.7	1331.21	1327.73	1325.33
1322.52	1319.04	1316.23	1318.85	1311.35	1327.06
1323.66	1316.86	1321.9	1315.22	1317.72	1314.55
1325.18	1326.19	1313.55	1318.2	1327.32	1321.35
1337.34	1340.87	1329.54	1326.25	1329.61	1342.67
1327.34	1340.92	1327.34	1317.44	1329.8	1319.14
1330.24	1348	1326.48	1324.74	1324.83	1323.94
1346.35	1340.11	1348.49	1348.62	1369.73	1347.94
1359.78	1355.33	1351.31	1363.31	1357.95	1357.51
1348.67	1348.13	1345.81	1344.42	1344.94	1358.68
1361.05	1358.92	1350.71	1363.17	1378.09	1360.93
1363.12	1367.25	1359.75	1351.49	1366.03	1367.74
1362.73	1366.86	1364.5	1379.68	1362.91	1367.73
1368.16	1370.35	1365.13	1388.55	1367.94	1363.54
1369.22	1380.65	1355.52	1367.61	1374.1	1375.59
1356.34	1355	1353.82	1360.03	1352.83	1366.39
1359.88	1350.95	1360.4	1360.12	1360.95	1358.35
1369.13	1355.87	1378.52	1375.14	1364.63	1364.62
1350.3	1341.56	1349.14	1344.34	1339.05	1348.15
1363.87	1355	1359.39	1350.38	1361.26	1374.65
1383.24	1367.23	1371.92	1389.49	1384.76	1382.94
1375.63	1381.27	1392.77	1365.77	1389.16	1371.66
1372.57	1374.15	1363.26	1374.96	1374.57	1362.73
1382.52	1378.93	1371.6	1374.1	1379.72	1382.05
1378.69	1371.13	1376.57	1371.56	1379.85	1368.12
1366.72	1353.28	1349.56	1374.47	1371.82	1373.65
1384.35	1376.53	1393.26	1397.44	1365.47	1377.93
1368.77	1384.48	1369.67	1366.87	1365.33	1358.67
1389.3	1370.51	1392.96	1385.13	1371.22	1396.63
1401.73	1402.94	1392.19	1403.68	1387.1	1404.08
1392.5	1398.82	1387.21	1387.28	1386.38	1395.88
1377.44	1378.6	1384.45	1362.16	1376.42	1370.05
1413.85	1411.15	1421.29	1413.08	1414.32	1419.53
1413.36	1419.89	1438.2	1393.78	1414.53	1415.5
1421.26	1411.88	1430.49	1424.31	1432.43	1422.28
1425.87	1430.6	1408.2	1421	1429.77	1432.51
1405.84	1418	1406	1406.85	1409.22	1413.81
1411.07	1402.21	1407.19	1397.98	1408.53	1410.34
1415.27	1408.3	1424.52	1408.3	1431.76	1427.12
1412.18	1413.34	1410.79	1416.4	1423.27	1416.12
1417.61	1426.02	1421.44	1428.58	1412.88	1416.79
1408.04	1419.42	1404.6	1414.55	1403.34	1412.71
1406.92	1412.7	1411.86	1409.58	1413.65	1408.67
1409.37	1403.68	1421.99	1399.32	1417.99	1421.12
1437.23	1427.76	1431.19	1441.47	1434.76	1439.09
1431.69	1433.76	1412.83	1432.21	1441.39	1430.44
1430.01	1433.4	1420.19	1426.71	1420.24	1429.86
1427.32	1417.96	1440.87	1437.76	1426.23	1433.43
1436.15	1436.66	1437.65	1429.02	1444.97	1423.91
1446.25	1449.08	1443.1	1460.57	1441.69	1435.98
1427.38	1436.26	1418.21	1421.28	1428.89	1425.21
1441.03	1432.61	1449.99	1434.68	1441.2	1444.35
1437.19	1441.93	1439.3	1435.75	1435.3	1441.88
1449.71	1439.78	1448.22	1437.9	1434.23	1447.08
1449.37	1445.74	1444.02	1444.77	1446.94	1436.98
1441.21	1440.54	1439.33	1441.26	1443.01	1424.48
1457.62	1470.52	1454.26	1442.6	1459.64	1455.75
1466.6	1494.77	1471.27	1458.94	1473.36	1462.75
1452.65	1454.81	1463.64	1440.22	1460.9	1454.39
1449.56	1453.77	1431.46	1445.21	1446.96	1456.6
1463.48	1472.05	1449.94	1472.53	1462.03	1456.21
1475.62	1464.05	1474.27	1471.3	1490.23	1485.73
1463.97	1470.48	1464.21	1461.74	1471.87	1460.23
1468.13	1457.58	1453.7	1469.41	1468.78	1466.21
1460.58	1474.43	1454.51	1450.51	1459.24	1461.37
1449.57	1461.84	1445.47	1450.86	1459.02	1434.4
1469.11	1473.38	1464.64	1464.07	1478.62	1486.94
1446.92	1440.06	1442.25	1440.79	1446.7	1444.06
